# Supplementary material for: CRISPRi chemical genetics and comparative genomics identify genes mediating drug potency in Mycobacterium tuberculosis
Source: PubMed Central journal article supplement (PMC9159947; doi:10.1038/s41564-022-01130-y), 2022-05-30
Supplement: 41564_2022_1130_MOESM1_ESM.pdf [file 41564_2022_1130_MOESM1_ESM.pdf]

---

**Supplementary information**

---

**CRISPRi chemical genetics and comparative genomics identify genes mediating drug potency in *Mycobacterium tuberculosis***

---

In the format provided by the authors and unedited

# Supplementary Information

To

## CRISPRi chemical genetics and comparative genomics identify genes mediating drug potency in *Mycobacterium tuberculosis*

Shuqi Li<sup>1\*</sup>, Nicholas C. Poulton<sup>1\*</sup>, Jesseon S. Chang<sup>1</sup>, Zachary A. Azadian<sup>1</sup>, Michael A. DeJesus<sup>1</sup>, Nadine Ruecker<sup>2</sup>, Matthew D. Zimmerman<sup>3</sup>, Kathryn A. Eckart<sup>1</sup>, Barbara Bosch<sup>1</sup>, Curtis A. Engelhart<sup>2</sup>, Daniel F. Sullivan<sup>2</sup>, Martin Gengenbacher<sup>3,4</sup>, Véronique A. Dartois<sup>3,4</sup>, Dirk Schnappinger<sup>2</sup>, Jeremy M. Rock<sup>1</sup>

1: Laboratory of Host-Pathogen Biology, The Rockefeller University, New York, New York, United States of America

2: Department of Microbiology and Immunology, Weill Cornell Medicine, New York, New York, United States of America

3: Center for Discovery and Innovation, Hackensack Meridian Health, Nutley, New Jersey, USA

4: Hackensack Meridian School of Medicine, Hackensack Meridian Health, Nutley, New Jersey, USA

\*: co-first authors

Address correspondence to: [rock@rockefeller.edu](mailto:rock@rockefeller.edu)

### **This Supplementary Information file contains the following:**

- |                                       |           |
|---------------------------------------|-----------|
| • Supplementary Methods               | Page 2-4  |
| • Reference for Supplementary Methods | Page 4    |
| • Supplementary Tables 1-4            | Page 5-11 |

## Supplementary Methods

### Construction of the $\Delta$ *whiB7* and complemented Mtb strains

The Mtb  $\Delta$ *whiB7* strain was constructed by allelic exchange using a RecET-mediated recombineering approach as previously described<sup>1</sup>. Deletion of *whiB7* was confirmed by PCR and whole-genome sequencing (BGI). The  $\Delta$ *whiB7* strain was complemented by reintroducing a wild-type copy of *whiB7* expressed from its native promoter integrated at *attL5*. Plasmid sequences and maps can be found in **Supplementary Table 2**.

### Antimicrobial compounds

All compounds used in this study (**Supplementary Table 4**) were purchased from commercial manufacturers with the exception of GSK3011724A, which was synthesized at the Memorial Sloan Kettering Organic Synthesis core as described in<sup>2</sup>.

### NGS data processing, analysis, and hit calling

Sequencing counts were obtained in the manner described by<sup>3</sup>. Counts were normalized for sequencing depth and an sgRNA limit of detection (LOD) cut-off was set at 100 counts in the DMSO condition. Only sgRNAs that made the LOD cut-off (i.e. counts > 100) were analyzed further. Replicate screens were quality controlled to ensure that the Pearson correlation was >0.95 for both the non-targeting sgRNA sets and essential-gene targeting sgRNA<sup>3</sup> sets between each replicate screen. sgRNA counts were analyzed using MAGeCK (version 0.5.9.2) in python (version 2.7.16)<sup>4</sup> comparing each drug treatment condition to the matched vehicle control (DMSO) sample. Gene-level log<sub>2</sub> fold change (L2FC) was calculated using the 'alphamedian' approach specified with the 'gene-lfc-method' parameter, which estimates the gene-level L2FC as the median of sgRNAs that are ranked above the default cut off in the Robust Rank Aggregation used by MAGeCK.

Negative control sgRNAs were used to calculate the null distribution and to normalize counts using the '--control-sgrna' and '--normalization control' parameters, respectively. MAGeCK gene summary output results can be found in **Source Data 1**.

Unless otherwise specified, a gene was determined to be a hit in a given condition if it had a false discovery rate (FDR) < 0.01 and a log<sub>2</sub> fold change (L2FC) < -1 in negative selection or L2FC > 1 in positive selection.

### Clustered heatmap

L2FC values from the MAGeCK output (**Source Data 1**) were used for the generation of a clustered heatmap. Genes were clustered based on Euclidean distance using the Ward clustering criterion. Only genes that hit (FDR < 0.01; n=676 genes) in two or more conditions are included in the heatmap. A condition is defined as any single drug concentration screen (e.g. rifampicin "High"). A gene's L2FC was only represented in the heatmap if the FDR was below 0.01 in the specific treatment condition; genes not meeting this significance threshold are shown as white in the relevant treatment condition. Treatment conditions were clustered based on Pearson correlation using the Ward criterion. Clustering was done using the package hclust and the heatmap was generated using the heatmap.2 function from the package gplots (R version 4.0.5).

### RNA-seq cDNA library construction and deep sequencing

Triplicate cultures were grown to mid-log phase in 7H9 and diluted back to OD<sub>600</sub>=0.2 in 7H9 in the presence or the absence of ATc (100 ng/mL). Cultures were incubated for 48 hours, after which total RNA was extracted as described in "Total RNA extraction and qRT-PCR." Following RNA cleanup (Zymo Research R1017), 2 μg total RNA for each sample was depleted for rRNA using a Ribominus Transcriptome Isolation Kit (Invitrogen K1550-

03). Following rRNA depletion, RNA was concentrated using an RNA Clean and Concentration-5 kit (Zymo Research R1013). RNA quality was then confirmed by Bioanalyzer (Agilent RNA 6000 Pico 5067-1513).

We used the NEB Next Ultra II Directional RNA Library Prep Kit (NEB E7760 and E7765) to prepare cDNA libraries following manufacturer's instructions. Briefly, 150 ng of rRNA-depleted RNA was subjected to fragmentation by incubating samples at 94°C for 20 min, followed by first strand cDNA synthesis (10 minutes at 25°C, 50 minutes at 42°C, 15 minutes at 70°C, hold at 4°C). Second-strand synthesis was performed at 16°C for 1.5 hours. DNA purification was performed with AMPure XP beads (Beckman Coulter A63881). End repair was performed for 30 minutes at 20°C, followed by 30 minutes at 65°C. Repaired dsDNA was adaptor ligated (15 minutes at 37°C) and purified with AMPure XP beads. Eluted DNA was amplified by PCR using NGS primers supplied with the kit (NEBNext Multiplex Oligos for Illumina, Index Primers Set 1 and 2, E7335S, E7500S) for 12 cycles of amplification. Amplicons were purified with AMPure XP beads, quantified by Qubit dsDNA HS Assay kit (ThermoFisher Scientific Q32851), and quality controlled by BioAnalyzer (Agilent DNA 1000 5067-1504). RNAseq libraries were sequenced on an Illumina NextSeq 500 (mid-output, 75 bp paired-end reads).

### **Processing and analysis of RNA-seq data**

Raw FASTQ files were aligned to the H37Rv genome (NC\_018143.2) using Rsubread (version 2.0.1)<sup>5</sup> with default settings. Transcript abundances were calculated by processing the resulting BAM files with the summarizeOverlaps function of the R package GenomicAlignments (version 1.22.1)<sup>6</sup>. Overlaps were calculated in the "Union" mode, ensuring reads were counted only if they overlap a portion of a single gene/feature. 16S, 23S, and 5S rRNA features (RVBD6018, 6019, and 6020, respectively) were manually removed from the count data to prevent confounding downstream differential gene expression analysis. Differential expression analysis was conducted using DESeq2 (version 1.30.1)<sup>7</sup> with default parameters.

### **Cell wall permeability assay**

Cell envelope permeability was determined using the ethidium bromide (EtBr) uptake assay as previously described<sup>8</sup>. Briefly, mid-log-phase Mtb cultures were washed once in PBS + 0.05% Tween-80 and adjusted to OD<sub>600</sub>=0.8 in PBS supplemented with 0.4% glucose. 100 µL of bacterial suspension was added to a black 96-well clear-bottomed plate (Costar). After this, 100 µL of 2 µg/mL EtBr in PBS supplemented with 0.4% glucose was added to each well. EtBr fluorescence was measured (excitation: 530 nm/emission: 590 nm) at 1 min intervals over a course of 60 min. Experiments were performed in technical triplicate.

A similar assay was performed to determine envelope permeability to a fluorescent vancomycin analogue, except that: (1) the bacterial suspension was adjusted at OD<sub>600</sub>=0.4 in PBS supplemented with 0.4% glucose; (2) cells were incubated with 2 µg/mL BODIPY FL Vancomycin (Thermo Scientific V34850); (3) 200 µL sample aliquots were taken at different time points, washed twice with PBS, resuspended in 200 µL PBS; and (4) fluorescence was measured (excitation: 485 nm/emission: 538 nm) and normalized to the OD<sub>600</sub> of the final bacterial suspension.

### **Whole genome sequencing data aggregation, alignment, SNP calling and annotation**

FASTQ data were downloaded from NCBI using the SRA Toolkit (version 2.9.6). A list of accession numbers of all analyzed FASTQ files is provided in **Source Data 4**. FASTQ reads were aligned to the H37Rv genome (NC\_018143.2) and SNPs were called and annotated using Snippy<sup>9</sup> (version 3.2-dev) using default parameters (minimum mapping quality of 60 in BWA, SAMtools base quality threshold of 20, minimum coverage of 10, minimum proportion of reads that differ from reference of 0.9). Mapping quality and coverage was further assessed using QualiMap with the default parameters (version 2.2.2-dev)<sup>10</sup>. Samples with a mean coverage < 30, mean mapping quality ≤ 45, or GC content ≤ 50% or ≥ 70% were excluded. Spoligotypes were assigned using SpoTyping (version 2.1)<sup>11</sup>. Drug resistance conferring SNPs were annotated using Mykrobe v0.9.0<sup>12</sup>.

Phylogenetic trees were built using FastTree (version 2.1.11 SSE3)<sup>13</sup>. A list of SNPs in essential genes was concatenated to build phylogenetic trees. Indels, drug resistance-conferring SNPs, and SNPs in repetitive regions of the genome (PE/PPE genes, transposases and prophage genes) were excluded. Tree visualization was performed in iTol (<https://itol.embl.de/>).

### Sublineage identification

Mtb sublineages were assigned to each sample using a set of lineage identifying SNPs. Lineage identifying SNPs from<sup>14,15</sup> were combined and then reduced to a subset of synonymous SNPs occurring in essential genes. For each sample, the percentage of lineage identifying SNPs present was calculated for each possible sublineage. A threshold of 67% was set as the minimum percentage of sublineage identifying SNPs required in order to define a sublineage. For each sample, all sublineages meeting this threshold were then evaluated to determine if they formed a continuous line of descent from the highest sublineage to the lowest (e.g. lineage1 → lineage1.2 → lineage1.2.1 → lineage1.2.1.1). Samples with a continuous line of descent were assigned the most specific sublineage (e.g. lineage1.2.1.1). If the set of sublineages included other sublineages that did not fit within the line of descent, the sublineage call was marked as “not confident” and considered as an undetermined sublineage.

### References for Supplementary Methods

1. Murphy, K. C., Papavinasasundaram, K. & Sasseti, C. M. Mycobacterial recombineering. *Methods Mol. Biol.* **1285**, 177–99 (2015).
2. Kumar, P. *et al.* Synergistic Lethality of a Binary Inhibitor of *Mycobacterium tuberculosis* KasA. *MBio* **9**, (2018).
3. Bosch, B. *et al.* Genome-wide gene expression tuning reveals diverse vulnerabilities of *M. tuberculosis*. *Cell* **184(17)**, 4579–4592 (2021).
4. Li, W. *et al.* MAGeCK enables robust identification of essential genes from genome-scale CRISPR/Cas9 knockout screens. *Genome Biol.* **15**, 554 (2014).
5. Liao, Y., Smyth, G. K. & Shi, W. The R package Rsubread is easier, faster, cheaper and better for alignment and quantification of RNA sequencing reads. *Nucleic Acids Res.* **47**, (2019).
6. Lawrence, M. *et al.* Software for Computing and Annotating Genomic Ranges. *PLoS Comput. Biol.* **9**, 1–10 (2013).
7. Love, M. I., Huber, W. & Anders, S. Moderated estimation of fold change and dispersion for RNA-seq data with DESeq2. *Genome Biol.* **15**, 1–21 (2014).
8. Xu, W. *et al.* Chemical Genetic Interaction Profiling Of Intrinsic Antibiotic Resistance in *Mycobacterium tuberculosis*. *Antimicrob. Chemother* **61**, 1–15 (2017).
9. Bush, S. J. *et al.* Genomic diversity affects the accuracy of bacterial single-nucleotide polymorphism-calling pipelines. *Gigascience* **9**, 1–21 (2020).
10. Okonechnikov, K., Conesa, A. & García-Alcalde, F. Qualimap 2: Advanced multi-sample quality control for high-throughput sequencing data. *Bioinformatics* **32**, 292–294 (2016).
11. Xia, E., Teo, Y. Y. & Ong, R. T. H. SpoTyping: Fast and accurate in silico *Mycobacterium* spoligotyping from sequence reads. *Genome Med.* **8**, 19 (2016).
12. Hunt, M. *et al.* Antibiotic resistance prediction for *Mycobacterium tuberculosis* from genome sequence data with Mykrobe. *Wellcome open Res.* **4**, 191 (2019).
13. Price, M. N., Dehal, P. S. & Arkin, A. P. FastTree 2 - Approximately maximum-likelihood trees for large alignments. *PLoS One* **5**, (2010).
14. Coll, F. *et al.* A robust SNP barcode for typing *Mycobacterium tuberculosis* complex strains. *Nat. Commun.* **5**, (2014).
15. Palittapongarnpim, P. *et al.* Evidence for Host-Bacterial Co-evolution via Genome Sequence Analysis of 480 Thai *Mycobacterium tuberculosis* Lineage 1 Isolates. *Sci. Rep.* **8**, 1–14 (2018).

## Supplementary Tables

**Supplementary Table 1:** Drugs Profiled and their Target Processes

| <b>Drug</b>    | <b>Abbreviation</b> | <b>Class</b>    | <b>Target Process</b>        |
|----------------|---------------------|-----------------|------------------------------|
| Bedaquiline    | BDQ                 | Diarylquinoline | ATP synthesis                |
| Clarithromycin | CLR                 | Macrolide       | Translation                  |
| Ethambutol     | EMB                 | Ethylenediamine | Arabinogalactan biosynthesis |
| Isoniazid      | INH                 | Pyridine        | Mycolic acid biosynthesis    |
| Levofloxacin   | LVX                 | Fluoroquinolone | DNA replication              |
| Linezolid      | LZD                 | Oxazolidinone   | Translation                  |
| Rifampicin     | RIF                 | Rifamycin       | Transcription                |
| Streptomycin   | STR                 | Aminoglycoside  | Translation                  |
| Vancomycin     | VAN                 | Glycopeptide    | Peptidoglycan biosynthesis   |

## Supplemental Table 2: List of plasmids and primers used in this work

### Plasmids used in this work

| Fig. used                      | Plasmid Name             | Plasmid genotype                                                                              | Plasmid description                                                                                                                                                                                                                       | Plasmid Map                                                                                                     | Resistance marker          |
|--------------------------------|--------------------------|-----------------------------------------------------------------------------------------------|-------------------------------------------------------------------------------------------------------------------------------------------------------------------------------------------------------------------------------------------|-----------------------------------------------------------------------------------------------------------------|----------------------------|
| 2,3,4,5, S4, S5, S6, S7, S8,S9 | pIRL58 (Addgene #166886) | Ptet(gB73)-Sth1 dCas9<br>Ptet(gB52)-Sth1 sgRNA<br>P(gB37)-TetRCO(tetO N) L5 attP only v1::Kan | Sth1 dCas9 CRISPRi plasmid optimized for use in <i>M. tuberculosis</i> . Sth1 dCas9 and the sgRNA are induced in the presence of ATc. This plasmid lacks the full L5 integrase and must be co-transformed pIRL19                          | <a href="https://benchling.com/s/seq-Gv9EfPn1vM7OMu6HPyU3">https://benchling.com/s/seq-Gv9EfPn1vM7OMu6HPyU3</a> | Kanamycin                  |
| 2,3,4,5, S4, S5, S6, S7, S8,S9 | pIRL19 (Addgene #163634) | Pmpo-L5 Int AmpR (suicide plasmid)                                                            | The L5 phage Int protein is expressed from the mycobacterial optimized promoter (MOP). This backbone is non-replicating and non-integrating in mycobacteria.                                                                              | <a href="https://benchling.com/s/seq-BAF0JelwBQN6D2dw5alf">https://benchling.com/s/seq-BAF0JelwBQN6D2dw5alf</a> | Ampicillin                 |
| 2, S5, S8                      | pIRL60                   | pDE43-MCZtq26<br>Tweety<br>attP::Zeo (empty vector)                                           | Tweety::Zeo integration backbone. Contains the Tweety Int with a zeocin resistance cassette.                                                                                                                                              | <a href="https://benchling.com/s/seq-s6M31jHfAUSXmCI90JQc">https://benchling.com/s/seq-s6M31jHfAUSXmCI90JQc</a> | Chloramphenicol/<br>Zeocin |
| 2, S5                          | pIRL140                  | pIRL60-PmtrA-mtrA<br>Tweety<br>attP::Zeo                                                      | CRISPRi resistant allele of the mtrA ORF under the expression of the endogenous mtrA promoter (300 bp upstream of the mtrA translational start site). Cloned by Gibson assembly into EcoRV and XbaI-digested pIRL60.                      | <a href="https://benchling.com/s/seq-T2YS6JwBvXhdDigP54Wp">https://benchling.com/s/seq-T2YS6JwBvXhdDigP54Wp</a> | Chloramphenicol/<br>Zeocin |
| 2, S5                          | pIRL141                  | pIRL60-PmtrA-mtrB<br>Tweety<br>attP::Zeo                                                      | CRISPRi resistant allele of the mtrB ORF under the expression of the endogenous mtrA promoter (300 bp upstream of the mtrA translational start site). Cloned by Gibson assembly into EcoRV and XbaI-digested pIRL60.                      | <a href="https://benchling.com/s/seq-BaNN2970G1ukBaFngZ3b">https://benchling.com/s/seq-BaNN2970G1ukBaFngZ3b</a> | Chloramphenicol/<br>Zeocin |
| 2, S5                          | pIRL142                  | pIRL60-Phsp60-lpqB<br>Tweety<br>attP::Zeo                                                     | CRISPRi resistant allele of the lpqB ORF under the expression of the hsp60 promoter. Cloned by Gibson assembly into EcoRV and XbaI-digested pIRL60.                                                                                       | <a href="https://benchling.com/s/seq-n98842nj4uVFdah5COhw">https://benchling.com/s/seq-n98842nj4uVFdah5COhw</a> | Chloramphenicol/<br>Zeocin |
| 4, 5, S7                       | pIRL133                  | pIRL133 Giles<br>attP::Zeo (empty vector)                                                     | Vector used for bacA and ettA experiments. Integrating vector containing the Giles attP site and expressing a zeocin resistance cassette. Must be co-transformed with pIRL40. Contains barcode random barcode sequence AAATAAAAACCACTCTCC | <a href="https://benchling.com/s/seq-m7KsnT49GbAKHZOruvjn">https://benchling.com/s/seq-m7KsnT49GbAKHZOruvjn</a> | Zeocin                     |
| 4, 5, S7                       | pIRL40                   | Puv15-Giles Int (suicide plasmid)                                                             | The Giles phage Int protein is expressed from the Puv15 promoter. This backbone is non-replicating and non-integrating in mycobacteria.                                                                                                   | <a href="https://benchling.com/s/seq-2PVXvHq0CfNPVawcz1Ku">https://benchling.com/s/seq-2PVXvHq0CfNPVawcz1Ku</a> | Ampicillin                 |
| 4, S7                          | pINP411                  | pIRL133-Phsp60-bacA<br>WT Giles<br>attP::Zeo                                                  | pIRL133 backbone expressing the WT bacA allele under the hsp60 promoter. Contains random barcode sequence TCGGGAATTCTCACGCGT                                                                                                              | <a href="https://benchling.com/s/seq-xm930WSRuZg57YePOv6V">https://benchling.com/s/seq-xm930WSRuZg57YePOv6V</a> | Zeocin                     |
| 4                              | pINP412                  | pIRL133-Phsp60-bacA<br>Trp153Ser<br>Giles<br>attP::Zeo                                        | pIRL133 backbone expressing the Trp153Ser bacA allele under the hsp60 promoter. Contains random barcode sequence ATCAGTGTTCATACAAG                                                                                                        | <a href="https://benchling.com/s/seq-xS0HjAji13meB6dNLvRZ">https://benchling.com/s/seq-xS0HjAji13meB6dNLvRZ</a> | Zeocin                     |
| 4                              | pINP413                  | pIRL133-Phsp60-bacA<br>Tyr288Stop<br>Giles<br>attP::Zeo                                       | pIRL133 backbone expressing the Tyr288Stop bacA allele under the hsp60 promoter. Contains random barcode sequence GCCGTTTGGGACTCGTCT                                                                                                      | <a href="https://benchling.com/s/seq-wc5ZxwPFHxRtKA64bRKt">https://benchling.com/s/seq-wc5ZxwPFHxRtKA64bRKt</a> | Zeocin                     |
| S7                             | pINP415                  | pIRL133-Phsp60-bacA<br>Asp546Ala<br>Giles<br>attP::Zeo                                        | pIRL133 backbone expressing the Asp546Ala bacA allele under the hsp60 promoter. Contains random barcode sequence ATACTCAAGTTTATATAT                                                                                                       | <a href="https://benchling.com/s/seq-vLyBVRz5sgy98D3Kevt6">https://benchling.com/s/seq-vLyBVRz5sgy98D3Kevt6</a> | Zeocin                     |

|       |         |                                                    |                                                                                                                                                                                                                                     |                                                                                                                                                                       |                            |
|-------|---------|----------------------------------------------------|-------------------------------------------------------------------------------------------------------------------------------------------------------------------------------------------------------------------------------------|-----------------------------------------------------------------------------------------------------------------------------------------------------------------------|----------------------------|
| 4     | pINP416 | pIRL133-Phsp60-bacA Leu551fs Giles attP::Zeo       | pIRL133 backbone expressing the Leu551fs bacA allele under the hsp60 promoter. Contains random barcode sequence GGGAGTCTGTCTCTACCA                                                                                                  | <a href="https://benchling.com/s/seq-7qlml27CxTswBCArMKaw">https://benchling.com/s/seq-7qlml27CxTswBCArMKaw</a>                                                       | Zeocin                     |
| 4     | pINP417 | pIRL133-Phsp60-bacA Gly554fs Giles attP::Zeo       | pIRL133 backbone expressing the Gly554fs bacA allele under the hsp60 promoter. Contains random barcode sequence TTGGTACCCCGTTATAGT                                                                                                  | <a href="https://benchling.com/s/seq-PjFZhXAUmUCuo0V1kSwi">https://benchling.com/s/seq-PjFZhXAUmUCuo0V1kSwi</a>                                                       | Zeocin                     |
| S7    | pINP422 | pIRL133-Phsp60-bacA Val118Ala Giles attP::Zeo      | pIRL133 backbone expressing the Val118Ala bacA allele under the hsp60 promoter. Contains random barcode sequence TTGCTCATATTCGCGGTA                                                                                                 | <a href="https://benchling.com/s/seq-2gsmPyD9adel4O452V1c">https://benchling.com/s/seq-2gsmPyD9adel4O452V1c</a>                                                       | Zeocin                     |
| S7    | pINP370 | Ptet(gB52)-bacA L5 attP: Kan                       | L5 integrating plasmid constitutively expressing the Mtb bacA allele under the synthetic Ptet(gB52) promoter in the absence of a Tet repressor                                                                                      | <a href="https://benchling.com/s/seq-WDve9cLzU2bhPwCEhNCM">https://benchling.com/s/seq-WDve9cLzU2bhPwCEhNCM</a>                                                       | Kanamycin                  |
| S7    | pINP371 | Ptet(gB52)-Empty L5 attP: Kan                      | L5 integrating plasmid with the synthetic Ptet(gB52) promoter and no downstream gene. As with pINP370 this plasmid lacks a Tet repressor                                                                                            | <a href="https://benchling.com/s/seq-84uPVQxdtoa9RgPuli6N">https://benchling.com/s/seq-84uPVQxdtoa9RgPuli6N</a>                                                       | Kanamycin                  |
| 5, S7 | pIRL134 | pIRL133-PettA-ettA WT Giles attP::Zeo              | pIRL133 backbone expressing a CRISPRi resistant WT allele of ettA under its endogenous promoter. Contains random barcode sequence TCGGGAATTCTCACGCGT                                                                                | <a href="https://benchling.com/s/seq-kKKvtvIIAOgThvBiZoD7">https://benchling.com/s/seq-kKKvtvIIAOgThvBiZoD7</a>                                                       | Zeocin                     |
| S7    | pIRL135 | pIRL133-PettA-ettA Pro39Ser Giles attP::Zeo        | pIRL133 backbone expressing a CRISPRi resistant Pro39Ser allele of ettA under its endogenous promoter. Contains random barcode sequence ATCAGTGTTTCATACAAG                                                                          | <a href="https://benchling.com/s/seq-m7KsnT49GbAKHZOruvjn">https://benchling.com/s/seq-m7KsnT49GbAKHZOruvjn</a>                                                       | Zeocin                     |
| 5, S7 | pIRL136 | pIRL133-PettA-ettA Gly41Glu Giles attP::Zeo        | pIRL133 backbone expressing a CRISPRi resistant Gly41Glu allele of ettA under its endogenous promoter. Contains random barcode sequence GCCGTTTGGGACTCGTCT                                                                          | <a href="https://benchling.com/s/seq-2YfWjMdXzrg5u8DjRT3U">https://benchling.com/s/seq-2YfWjMdXzrg5u8DjRT3U</a>                                                       | Zeocin                     |
| 5, S7 | pIRL137 | pIRL133-PettA-ettA Trp135Gly Giles attP::Zeo       | pIRL133 backbone expressing a CRISPRi resistant Trp135Gly allele of ettA under its endogenous promoter. Contains random barcode sequence ATACTCAAGTTTATATAT                                                                         | <a href="https://benchling.com/s/seq-HMeozzDPogc92G7zvBbR">https://benchling.com/s/seq-HMeozzDPogc92G7zvBbR</a>                                                       | Zeocin                     |
| 5, S7 | pIRL138 | pIRL133-PettA-ettA Val426Ala Giles attP::Zeo       | pIRL133 backbone expressing a CRISPRi resistant Val426Ala allele of ettA under its endogenous promoter. Contains random barcode sequence TTGGTACCCCGTTATAGT                                                                         | <a href="https://benchling.com/s/seq-poxjOoLz4VkrB2pyW8Nc">https://benchling.com/s/seq-poxjOoLz4VkrB2pyW8Nc</a>                                                       | Zeocin                     |
| 5, S7 | pIRL139 | pIRL133-PettA-ettA Val426Met Giles attP::Zeo       | pIRL133 backbone expressing a CRISPRi resistant Val426Met allele of ettA under its endogenous promoter. Contains random barcode sequence GTCGGCTAGCAATATTCT                                                                         | <a href="https://benchling.com/s/seq-Cet0qyRkZVDzWjqk4Fu5">https://benchling.com/s/seq-Cet0qyRkZVDzWjqk4Fu5</a>                                                       | Zeocin                     |
| S8    | pIRL145 | pBR322-whiB7::Amp                                  | Backbone: pBR322. Cloned whiB7+5'UTR region, as PCR template for generating whiB7 KO mutant in Mtb. Cloned by Gibson assembly into ClaI and HindIII-digested pIRL39.                                                                | <a href="https://benchling.com/s/seq-8HUz8kLA4QtU3gEkTirl">https://benchling.com/s/seq-8HUz8kLA4QtU3gEkTirl</a>                                                       | Ampicillin                 |
| S8    | pIRL146 | pIRL60-PwhiB7-whiB7-Gly64delG(fs) Tweety attP::Zeo | whiB7-Gly64delG mutant ORF under the expression of the endogenous whiB7 promoter (500 bp upstream of the whiB7 translational start site including the 5'UTR region). Cloned by Gibson assembly into EcoRV and XbaI-digested pIRL60. | <a href="https://benchling.com/s/seq-EYD2RXXj3Zk3Rojw5ruG">https://benchling.com/s/seq-EYD2RXXj3Zk3Rojw5ruG</a>                                                       | Chloramphenicol/<br>Zeocin |
| S10   | pIRL165 | pIRL133-PmmpS5/L5-mmpS5/L5 Giles attP::Zeo         | pIRL133 backbone expressing the mmpS5/L5 operon driven by the endogenous promoter. Contains random barcode sequence TGCCACCGTGCCCTCGTT                                                                                              | <a href="https://benchling.com/s/seq-M4TANSLiy15qlcL88k0v?m=sIm-ICd3bvbRgpMtgMaMM3Er">https://benchling.com/s/seq-M4TANSLiy15qlcL88k0v?m=sIm-ICd3bvbRgpMtgMaMM3Er</a> | Zeocin                     |
| S10   | pIRL166 | pIRL133-Phsp60-mmpS5/L5 Giles attP::Zeo            | pIRL133 backbone expressing the mmpS5/L5 operon driven by the hsp60 promoter. Contains random barcode sequence TGCCACCGTGCCCTCGTT                                                                                                   | <a href="https://benchling.com/s/seq-6RKnURqDTWulUg93EGf?m=sIm-Gumk1xjfRkrlrx1TbHI">https://benchling.com/s/seq-6RKnURqDTWulUg93EGf?m=sIm-Gumk1xjfRkrlrx1TbHI</a>     | Zeocin                     |



## sgRNAs used in this work

| Fig. used                    | sgRNA ID                          | Gene targeted  | Gene name     | sgRNA targeting sequence (5'-3') | PAM (5'-3') |
|------------------------------|-----------------------------------|----------------|---------------|----------------------------------|-------------|
| 2,3,4,5,6 S4, S5, S6, S7, S8 | Non-Targeting control             | NA             | NA            | GCATCCGGAGCCCGTCCGTAA            | NA          |
| S4                           | <i>ccdA</i> sgRNA PAM 15          | <i>rv0527</i>  | <i>ccdA</i>   | ATCAGCACGCTCCGACCCGCT            | GCAGCAG     |
| S4                           | <i>kasA</i> sgRNA PAM 22          | <i>rv2245</i>  | <i>kasA</i>   | ATGTCGTGCTTCAGTAACGCCCG          | AAGGCAA     |
| S4                           | <i>mmpL3</i> sgRNA PAM 15         | <i>rv0206c</i> | <i>mmpL3</i>  | AACATCCGCACCACGGTCGCGT           | CCAGCAG     |
| S4                           | <i>embB</i> sgRNA PAM 8           | <i>rv3795</i>  | <i>embB</i>   | GACAGCGAACCGTCGACGGTGG           | GCAGGAT     |
| S4                           | <i>ripA</i> sgRNA PAM 10          | <i>rv1477</i>  | <i>ripA</i>   | GCTGCAGGTTGGCCATCACCGCT          | TGGGAAC     |
| 2, S5                        | <i>mtrA</i> sgRNA PAM 4           | <i>rv3246c</i> | <i>mtrA</i>   | GGTGAGCATCACGATCGGAACA           | CCGGAAT     |
| 2, S5                        | <i>mtrB</i> sgRNA PAM 2           | <i>rv3245c</i> | <i>mtrB</i>   | GTCCCGATGATCAGGGCCGGCCC          | GGAGAAA     |
| 2, S5                        | <i>lpqB</i> sgRNA PAM 1           | <i>rv3244c</i> | <i>lpqB</i>   | ACCCCCACATCCGAGAGCGAGC           | CGAGAAT     |
| 3, S6                        | <i>smpB</i> sgRNA PAM 15          | <i>rv3100c</i> | <i>smpB</i>   | GTGTGATCTGGCGGCGATGCA            | ACAGCAG     |
| 3, S6                        | <i>rv1473</i> sgRNA PAM 1         | <i>rv1473</i>  | <i>rv1473</i> | GCATAGGGTTTCGACCTCCCCCG          | CCAGAAT     |
| S6                           | <i>clpP2</i> sgRNA PAM 16         | <i>rv2460c</i> | <i>clpP2</i>  | GATGTACATGGTGATATCGCGG           | TCGGGAT     |
| 5, S8                        | <i>ettA</i> sgRNA PAM 2           | <i>rv2477c</i> | <i>ettA</i>   | ACGACACCGATCTTGGCGCCCGG          | ATAGAAA     |
| 5                            | <i>whiB7</i> promoter sgRNA PAM 6 | <i>rv3197A</i> | <i>whiB7</i>  | GCCTGTACCGCAAACGCGCAGG           | TCAGAAA     |
| 5                            | <i>tap</i> sgRNA PAM 5            | <i>rv1258c</i> | <i>tap</i>    | GCCCTCGCGCTGCAACACCAGCC          | ACGGAAA     |
| 5                            | <i>eis</i> sgRNA PAM 1            | <i>rv2416c</i> | <i>eis</i>    | GTCGGGCTACACAGGGTCACAGTC         | ACAGAAT     |

## qPCR primers used in this work

| Fig. used | Target gene    | Gene name     | Forward primer (5'-3') | Reverse primer (5'-3') |
|-----------|----------------|---------------|------------------------|------------------------|
| 2, 5, S5  | <i>rv2703</i>  | <i>sigA</i>   | GTGATTTCTGCTGGGATGAAGA | TACCTTGCCGATCTGTTTGAG  |
| 2, S5     | <i>rv3246c</i> | <i>mtrA</i>   | CCATCGCCGACGTAGAAAT    | AGCAGCACATCACGAGTAAA   |
| 2, S5     | <i>rv3245c</i> | <i>mtrB</i>   | ACCACGCCGAACACAAA      | AAACACCAGCTTCTCCTCAC   |
| 2, S5     | <i>rv3244c</i> | <i>lpqB</i>   | GTGCTGCGAGCGATACA      | GTCACGGGACAGTTGAAGAT   |
| 2, S5     | <i>rv1477</i>  | <i>ripA</i>   | TACTCGGGTTCGAGTACAA    | TTCGGGCCGTAGAAGATGA    |
| 2, S5     | <i>rv3810</i>  | <i>pirG</i>   | AACGACGTGATGCAGGTG     | TGCATGATCGACGGCATTAG   |
| 2, S5     | <i>rv0040c</i> | <i>mtc28</i>  | CATCACACACGGCTACATTGA  | CCTCGATGATTGATGACGGAAA |
| 2, S5     | <i>rv1158</i>  | <i>rv1158</i> | CCAACGCACCGCAAATC      | TGGAAAGGTGGCGTTATC     |
| 2, S5     | <i>rv0312</i>  | <i>rv0312</i> | CCATTGACCGGCTTCATCTA   | GACGAGTGTGGAACGAAAGA   |
| 2, S5     | <i>rv1566</i>  | <i>rv1566</i> | CTGTCTGGTTTACGGTCTG    | AACCCGACGGTGTGATG      |
| 2, S5     | <i>rv0129c</i> | <i>fbpC</i>   | GTGTTGCTGGACGGAATAA    | GGATGGCACCTGCAGATATT   |
| 5         | <i>rv3197a</i> | <i>whiB7</i>  | CAGACAAAGATTGCCGTTTT   | ACACACAGTGTCTTGGCTAC   |
| 5         | <i>rv1988</i>  | <i>erm</i>    | CCGCCGTACGGGATTTTC     | CGTTGCGAGAAGCGAATTTAC  |
| 5         | <i>rv2725c</i> | <i>hflx</i>   | GCTGTGCAGGTTAAGGTTATTG | GCAGCATGTACTCCATCTGAG  |
| 5         | <i>rv2416c</i> | <i>eis</i>    | TCACGAAGTTGGCGAGTTT    | CAGTACGTCCCGATCCATTTTC |

## Other primers used in this work

| Fig. used | Legacy Name | Sequence (5'-3')                                | Notes                          | Description                                                     |
|-----------|-------------|-------------------------------------------------|--------------------------------|-----------------------------------------------------------------|
| 3, S6     | oINP537     | GGTTGGGCAAGAGTTGACCGCG                          | rplC Amplification Fwd Primer  | rplC Amplification Fwd Primer, LZD-resistant Mtb                |
| 3, S6     | oINP538     | TCTGCTCTTGCGCAGCCATCAC                          | rplC Amplification Rev Primer  | rplC Amplification Rev Primer, LZD-resistant Mtb                |
| S10       | oINP531     | GCATACCAAGGCGTACGAGATAAC                        | Rrl Amplification Fwd Primer   | Rrl Amplification Fwd Primer, CLR-resistant Mtb                 |
| S10       | oINP532     | CTGATCTTGAGAAGGTTTCCCG                          | Rrl Amplification Rev Primer   | Rrl Amplification Rev Primer, CLR-resistant Mtb                 |
| 6, S9     | oLSQ564     | GAGGCCCTTTCGTCTTCAAGCGCCGATC<br>CGGTGCCGGG      | whiB7-mtb-500_fwd              | whiB7-KO Mtb mutant construction                                |
| 6, S9     | oLSQ565     | TGGATCCACTGCCGACACCAAATGCGTTG<br>TTGTCAATCAC    | whiB7-mtb-500_rev              | whiB7-KO Mtb mutant construction                                |
| 6, S9     | oLSQ566     | TGGTGTCGGCAGTGGATCCATAACTTCGT<br>ATAATGTATG     | whiB7-mtb-hyg_fwd              | whiB7-KO Mtb mutant construction                                |
| 6, S9     | oLSQ567     | GACGTCCGCGGGCGCGCCATAACTTCGT<br>ATAG            | whiB7-mtb-hyg_rev              | whiB7-KO Mtb mutant construction                                |
| 6, S9     | oLSQ568     | ATGGCGCGCCCGCGGACGTCCGCGCAA<br>G                | whiB7-mtb-500_fwd              | whiB7-KO Mtb mutant construction                                |
| 6, S9     | oLSQ569     | GTGATAAACTACCGCATTAAATGCTGCTGC<br>CCGACGGCC     | whiB7-mtb-500_rev              | whiB7-KO Mtb mutant construction                                |
| 6, S9     | oLSQ608     | CTGATCGGTACGCTGCTCGCCG                          | whiB7-KO-veri-F                | Validation primer to confirm removal of endogenous whiB7 allele |
| 6, S9     | oLSQ609     | AGTCCATTTGGCGCTCAGCTG                           | whiB7-KO-veri-R                | Validation primer to confirm removal of endogenous whiB7 allele |
| 6, S9     | oLSQ457     | CCTCTAGGGTCCCAGCTGGCCGGCATC<br>GGTGCCCGCA       | WhiB7+500-gibson-F             | Build whiB7 WT allele for complementation                       |
| 6, S9     | oLSQ458     | GTGGCAGGGCGGGCGTAATCTATGCAA<br>CAGCATCCTTGCGCGG | WhiB7+500-gibson-R             | Build whiB7 WT allele for complementation                       |
| 6, S9     | oLSQ669     | CCTCTAGGGTCCCAGCTGGCCGGCATC<br>GGTGCCCGCA       | pwhiB7-whiB7fs-F1              | Build Mtb whiB7-fs(Gly64delG) allele for complementation        |
| 6, S9     | oINP514     | ATCCTATGCCAGCTGGACGC                            | whiB7 Amplification Fwd Primer | whiB7 Amplification Fwd Primer                                  |
| 6, S9     | oINP546     | CCCGCAAGCTGGAACAATAC                            | whiB7 Amplification Rev Primer | whiB7 Amplification Rev Primer                                  |

**Supplementary Table 3: Additional acquired drug sensitivity candidate genes**

| Gene           | Drug    | Mutation   | Sublineage                                                                                           | Occurrences | Notes                                                                    |
|----------------|---------|------------|------------------------------------------------------------------------------------------------------|-------------|--------------------------------------------------------------------------|
| <i>whiB7</i>   | CLR     | Leu18fs    | lineage2.2.1: 100/6719                                                                               | 100         |                                                                          |
| <i>whiB7</i>   | CLR     | Ala60fs    | lineage4: 2/814, lineage4.8: 18/3234                                                                 | 20          |                                                                          |
| <i>hflX</i>    | CLR     | Glu206fs   | lineage4.9: 93/2941                                                                                  | 93          |                                                                          |
| <i>hflX</i>    | CLR     | Arg237fs   | lineage4.9: 12/2941                                                                                  | 12          |                                                                          |
| <i>hflX</i>    | CLR     | Gln367Stop | lineage4.2.1: 117/666, lineage4.6: 2/187                                                             | 119         |                                                                          |
| <i>rv2369c</i> | CLR     | Arg57fs    | None: 12/3241                                                                                        | 12          | Possible polar effect with <i>phoH1</i>                                  |
| <i>rv2369c</i> | CLR     | Cys58fs    | lineage3: 11/3537                                                                                    | 11          | Possible polar effect with <i>phoH1</i>                                  |
| <i>rv2369c</i> | CLR     | Gln72Stop  | lineage1.2.1: 2/164, lineage1.2.1.3: 78/435                                                          | 80          | Possible polar effect with <i>phoH1</i>                                  |
| <i>mmpL5</i>   | CLR/BDQ | Asp132fs   | None: 48/3241, lineage1.2.1: 1/164, lineage2.2.1: 5/6719, lineage4.1.1.3: 2/1178, lineage4.8: 1/3166 | 57          | Also observed in PMID: 32143680, may also confer clofazimine sensitivity |
| <i>mmpL5</i>   | CLR/BDQ | Arg202fs   | lineage4: 55/807                                                                                     | 55          | Also observed in PMID: 32143680, may also confer clofazimine sensitivity |
| <i>mmpL5</i>   | CLR/BDQ | Tyr300Stop | lineage1.1.1: 4/54, lineage1.1.1.1: 75/108, lineage4.8: 1/3166                                       | 80          | Also observed in PMID: 32143680, may also confer clofazimine sensitivity |
| <i>mmpL5</i>   | CLR/BDQ | Pro498fs   | lineage2.2.2: 1/747, lineage4.6: 59/187                                                              | 60          | Also observed in PMID: 32143680, may also confer clofazimine sensitivity |
| <i>rv3822</i>  | BDQ     | Leu123fs   | None: 40/2223                                                                                        | 40          |                                                                          |
| <i>rv3822</i>  | BDQ     | Tyr208fs   | lineage4: 4/814, lineage4.8: 36/3234                                                                 | 40          |                                                                          |

**Supplementary Table 4: Antimicrobial compounds used in this study**

| <b>Antibiotic</b>          | <b>Use</b>                             | <b>Abbreviation</b> | <b>Product number</b>                          |
|----------------------------|----------------------------------------|---------------------|------------------------------------------------|
| Amikacin                   | Axenic culture                         | AMK                 | A0365900 (Sigma Aldrich)                       |
| Anhydrotetracycline        | Axenic culture                         | ATc                 | AC233135000 (Fisher Scientific)                |
| Azithromycin               | Mouse efficacy studies                 | AZM                 | NDC 42806-151-34 oral suspension (Epic Pharma) |
| Azithromycin-dihydrate     | Axenic culture                         | AZM                 | PZ0007 (Sigma Aldrich)                         |
| Bedaquiline                | Axenic culture                         | BDQ                 | A12327-5 (AdooQ Biosciences)                   |
| Capreomycin Sulfate        | Axenic culture                         | CAP                 | PHR1716 (Sigma Aldrich)                        |
| Chloramphenicol            | Axenic culture                         | CHL                 | C-105-5 (GoldBio)                              |
| Clarithromycin             | Axenic culture                         | CLR                 | C9742 (Sigma Aldrich)                          |
| Clarithromycin             | Mouse efficacy studies                 | CLR                 | NDC 0781-1962-60 tablets (Sandoz)              |
| Clindamycin hydrochloride  | Axenic culture                         | CLI                 | C-175-10 (GoldBio)                             |
| Clofazimine                | Axenic culture                         | CLO                 | TCC2866 (VWR)                                  |
| Ethambutol dihydrochloride | Axenic culture                         | EMB                 | E4630 (Sigma Aldrich)                          |
| Fusidic acid sodium salt   | Axenic culture                         | FA                  | F0881 (Sigma Aldrich)                          |
| GSK3011724A                | Axenic culture, macrophage infection   | GSK724A             | NA                                             |
| Isoniazid                  | Axenic culture, Mouse efficacy studies | INH                 | I3377 (Sigma Aldrich)                          |
| Kanamycin                  | Axenic culture                         | KAN                 | K-120-50 (GoldBio)                             |
| Levofloxacin               | Axenic culture                         | LFX                 | 28266 (Sigma Aldrich)                          |
| Lincomycin hydrochloride   | Axenic culture                         | LNC                 | 62143 (Sigma Aldrich)                          |
| Linezolid                  | Axenic culture                         | LZD                 | SML1290 (Sigma Aldrich)                        |
| Moxifloxacin               | Axenic culture                         | MFX                 | Y0000703 (Sigma Aldrich)                       |
| Rifampicin                 | Axenic culture, macrophage infection   | RIF                 | R0079 (TCI)                                    |
| Rifampicin                 | Mouse efficacy studies                 | RIF                 | NDC 61748-018-30 tablets (Akorn)               |
| Streptomycin sulfate       | Axenic culture                         | STR                 | S-150-100 (GoldBio)                            |
| Sutezolid                  | Axenic culture                         | SZD                 | PZ0035 (Sigma Aldrich)                         |
| Telithromycin              | Axenic culture                         | TLM                 | SML2162 (Sigma Aldrich)                        |
| Tigecycline hydrate        | Axenic culture                         | TGC                 | PZ0021 (Sigma Aldrich)                         |
| Vancomycin hydrochloride   | Axenic culture                         | VAN                 | V2002 (Sigma Aldrich)                          |
| Zeocin                     | Axenic culture                         | ZEO                 | J67140-8EQ (Alfa Aesar)                        |
